# Supplementary material for: Nanoscale spatial dependence of avidity in an IgG1 antibody
Source: bioRxiv or medRxiv preprint supplement (doi:10.1101/632323), 2020-09-10
Supplement: Supplementary file [file media-1.pdf]

Supplementary information for:

# **Nanoscale spatial dependence of avidity in an IgG1 antibody**

Agnieszka Jendroszek,<sup>1,2</sup> and Magnus Kjaergaard<sup>1-4\*</sup>

<sup>1</sup> Department of Molecular Biology and Genetics, Aarhus University

<sup>2</sup> The Danish Research Institute for Translational Neuroscience (DANDRITE)

<sup>3</sup> Aarhus Institute of Advanced Studies (AIAS)

<sup>4</sup> The Center for Proteins in Memory (PROMEMO)

\* Corresponding author: [magnus@mbg.au.dk](mailto:magnus@mbg.au.dk)

# Sequences of APH constructs

Color code:

**His-tag**

Thrombin site

*Flexible linker*

## APH<sub>half</sub>

MGSS**HHHHHH**SSGMKQLEKELKQLEKELQAIEKQLAQLQKKAQARKKKLAQLKKKLQA**PGSGSGP**MKQL  
EKELKQLEKELQAIEKQLAQLQWKAQARKKKLAQLKKKLQA

## APH<sub>4</sub>

MGSS**HHHHHH**SSGMKQLEKELKQLEKEAQARKWKLAQLKKKLQA

## APH<sub>4</sub>\_thrombin

MGSS**HHHHHH**SSG**LVPRGS**HMKQLEKELKQLEKEAQARKWKLAQLKKKLQA

## APH<sub>6</sub>

MGSS**HHHHHH**SSGMETKQLEKELKQLEKELQAIEKQLAQLQWKAQARKKKLAQLKKKLQA

## APH<sub>6</sub>\_thrombin

MGSS**HHHHHH**SSG**LVPRGS**HMKQLEKELKQLEKELQAIEKQLAQLQWKAQARKKKLAQLKKKLQA

## APH<sub>8</sub>

MGSS**HHHHHH**SSGMKQLEKELKQLEKELQAIEKQLAQLQKKLQAIEKQLAQLQWKAQARKKKLAQLKKK  
LQA

## APH<sub>8</sub>\_thrombin

MGSS**HHHHHH**SSG**LVPRGS**HMKQLEKELKQLEKELQAIEKQLAQLQKKLQAIEKQLAQLQWKAQARKKK  
LAQLKKKLQA

## APH<sub>10</sub>

MGSS**HHHHHH**SSGMKQLEKELKQLEKELQAIEKQLAQLQKKAQARKKKLKQLEKELQAIEKQLAQLQWK  
AQARKKKLAQLKKKLQA

**APH<sub>10</sub>\_thrombin**

MGSSHHHHHSSGLVPRGSHMKQLEKELKQLEKELQAIEKQLAQLQKKAQARKKKLKQLEKELQAIEKQL  
AQLQWKAQARKKKLAQLKKKLQA

**APH<sub>12</sub>**

MGSSHHHHHSSGMKQLEKELKQLEKELQAIEKQLAQLQKKAQARKKKLAQLKKKLQALEKELKQLEKE  
LQAIEKQLAQLQWKAQARKKKLAQLKKKLQA

**APH<sub>12</sub>\_thrombin**

MGSSHHHHHSSGLVPRGSHMKQLEKELKQLEKELQAIEKQLAQLQKKAQARKKKLAQLKKKLQALEKE  
LKQLEKELQAIEKQLAQLQWKAQARKKKLAQLKKKLQA

**APH<sub>16</sub>**

MGSSHHHHHSSGMKQLEKELKQLEKELQAIEKQLAQLQKKAQARKKKLQALEKELKQLEKELQAIEKQL  
AQLQKKAQARKKKLAQLKKKLKQLEKELQAIEKQLAQLQWKAQARKKKLAQLKKKLQA

**APH<sub>16</sub>\_thrombin**

MGSSHHHHHSSGLVPRGSHMKQLEKELKQLEKELQAIEKQLAQLQKKAQARKKKLQALEKELKQLEKEL  
QAIEKQLAQLQKKAQARKKKLAQLKKKLKQLEKELQAIEKQLAQLQWKAQARKKKLAQLKKKLQA

**APH<sub>18</sub>**

MGSSHHHHHSSGMKQLEKELKQLEKELQAIEKQLAQLQKKAQARKKKLAQLKKKLQALEKELKQLEKE  
LQAIEKQLAQLQKKAQARKKKLAQLKKKLQALEKELKQLEKELQAIEKQLAQLQWKAQARKKKLAQLKKK  
LQA

**APH<sub>18</sub>\_thrombin**

MGSSHHHHHSSGLVPRGSHMKQLEKELKQLEKELQAIEKQLAQLQKKAQARKKKLAQLKKKLQALEKEL  
KQLEKELQAIEKQLAQLQKKAQARKKKLAQLKKKLQALEKELKQLEKELQAIEKQLAQLQWKAQARKKKL  
AQLKKKLQA

**APH<sub>20</sub>**

MGSSHHHHHSSGMKQLEKELKQLEKELQAIEKQLAQLQKKAQARKKKKQLEKELQAIEKQLAQLQKKA  
QARKKKLAQLKKKLQALEKELKQLEKELQAIEKQLAQLQKKAQARKKKLKQLEKELQAIEKQLAQLQWKA  
QARKKKLAQLKKKLQA

**APH<sub>20</sub>\_thrombin**

MGSSHHHHHSSGLVPRGSHMKQLEKELKQLEKELQAIEKQLAQLQKKAQARKKKKQLEKELQAIEKQLA  
QLQKKAQARKKKLAQLKKKLQALEKELKQLEKELQAIEKQLAQLQKKAQARKKKLKQLEKELQAIEKQLA  
QLQWKAQARKKKLAQLKKKLQA

**APH<sub>24</sub>**

MGSSHHHHHSSGMKQLEKELKQLEKELQAIEKQLAQLQKKAQARKKKLAQLKKKLQALEKELKQLEKE  
LQAIEKQLAQLQWKAQARKKKLAQLKKKLQALEKELKQLEKELQAIEKQLAQLQKKAQARKKKLAQLKKK  
LQALEKELKQLEKELQAIEKQLAQLQWKAQARKKKLAQLKKKLQA

**APH<sub>24</sub>\_thrombin**

MGSSHHHHHSSGLVPRGSMKQLEKELKQLEKELQAIEKQLAQLQKKAQARKKKLAQLKKKLQALEKELK  
QLEKELQAIEKQLAQLQWKAQARKKKLAQLKKKLQALEKELKQLEKELQAIEKQLAQLQKKAQARKKKLA  
QLKKKLQALEKELKQLEKELQAIEKQLAQLQWKAQARKKKLAQLKKKLQA

**Table S1.** Kinetic constants determined by SPR for APH variants binding to THE His Ab.

| pH  | BIAcore evaluation software          |                           |                                         |                           | IGOR Pro                  |                           |                |
|-----|--------------------------------------|---------------------------|-----------------------------------------|---------------------------|---------------------------|---------------------------|----------------|
|     | $k_{on1}$<br>$10^3 \times (Ms)^{-1}$ | $k_{off1}$<br>$(ms^{-1})$ | $k_{on2}$<br>$10^{-4} \times (Ms)^{-1}$ | $k_{off2}$<br>$(ms^{-1})$ | $k_{off1}$<br>$(ms^{-1})$ | $k_{off2}$<br>$(ms^{-1})$ |                |
| 5.8 | APH <sub>4</sub>                     | 225.9 ± 2.4               | 19.2 ± 0.1                              | n.d.                      | n.d.                      | n.d.                      | n.d.           |
|     | APH <sub>6</sub>                     | 95.8 ± 0.5                | 18.5 ± 0.2                              | 2.74 ± 0.02               | 0.80 ± 0.01               | 22.6 ± 1.3                | 1.1 ± 0.12     |
|     | APH <sub>8</sub>                     | 76.7 ± 0.4                | 13.7 ± 0.2                              | 1.63 ± 0.02               | 0.63 ± 0.02               | 18.9 ± 1.0                | 0.78 ± 0.10    |
|     | APH <sub>10</sub>                    | 122.5 ± 0.2               | 14.8 ± 0.1                              | 2.39 ± 0.01               | 0.66 ± 0.01               | 19.5 ± 1.1                | 0.70 ± 0.068   |
|     | APH <sub>12</sub>                    | 100.8 ± 0.4               | 19.9 ± 0.2                              | 1.74 ± 0.01               | 0.62 ± 0.01               | 19.6 ± 1.1                | 0.60 ± 0.050   |
|     | APH <sub>16</sub>                    | 29.0 ± 0.3                | 20.8 ± 0.6                              | 0.94 ± 0.02               | 0.77 ± 0.03               | 16.7 ± 1.4                | 0.74 ± 0.14    |
|     | APH <sub>18</sub>                    | 47.7 ± 0.3                | 19.5 ± 0.3                              | 1.16 ± 0.01               | 1.26 ± 0.02               | 20.9 ± 1.7                | 1.5 ± 0.16     |
|     | APH <sub>20</sub>                    | 104.4 ± 0.3               | 15.5 ± 0.2                              | 1.88 ± 0.02               | 1.22 ± 0.01               | 17.4 ± 1.2                | 1.2 ± 0.095    |
|     | APH <sub>24</sub>                    | 65.2 ± 0.4                | 21.4 ± 0.4                              | 1.08 ± 0.01               | 1.48 ± 0.02               | 17.0 ± 1.2                | 1.3 ± 0.15     |
|     | APH <sub>half</sub>                  | 54.6 ± 1.4                | 18.5 ± 0.1                              | n.d.                      | n.d.                      | n.d.                      | n.d.           |
| 6.0 | APH <sub>12</sub>                    | 38.7 ± 0.3                | 4.30 ± 0.13                             | 0.54 ± 0.01               | 0.18 ± 0.003              | 6.5 ± 0.6                 | 0.17 ± 0.0135  |
|     | APH <sub>half</sub>                  | 118.8 ± 0.5               | 8.61 ± 0.06                             | n.d.                      | n.d.                      | n.d.                      | n.d.           |
| 6.2 | APH <sub>12</sub>                    | 66.9 ± 0.1                | 3.76 ± 0.02                             | 0.72 ± 0.004              | 0.11 ± 0.001              | 3.8 ± 0.3                 | 0.074 ± 0.0085 |
|     | APH <sub>half</sub>                  | 152.7 ± 0.7               | 6.22 ± 0.02                             | n.d.                      | n.d.                      | n.d.                      | n.d.           |

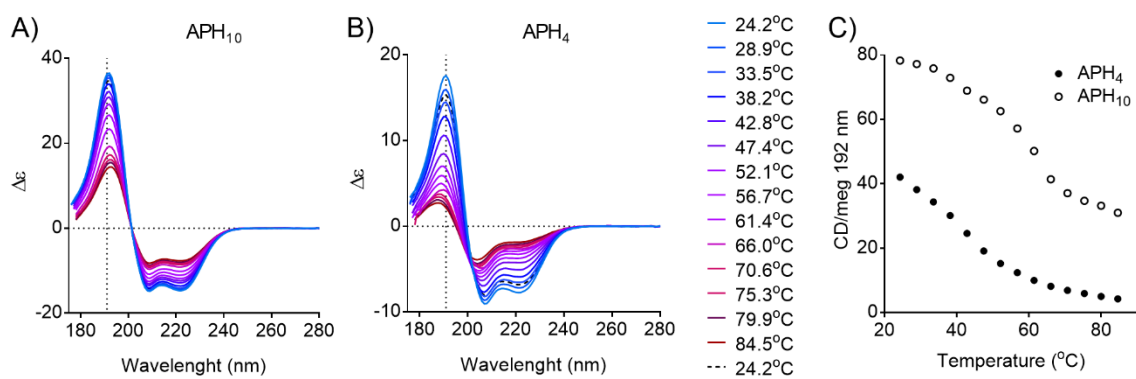

**Figure S1.** SR-CD spectra of APH<sub>10</sub> (A) and APH<sub>4</sub> (B) were measured at temperatures varying from 25°C to 85°C. Dotted line indicates 192 nm the wavelength at which change of the CD signal intensity with temperature was compared (C).

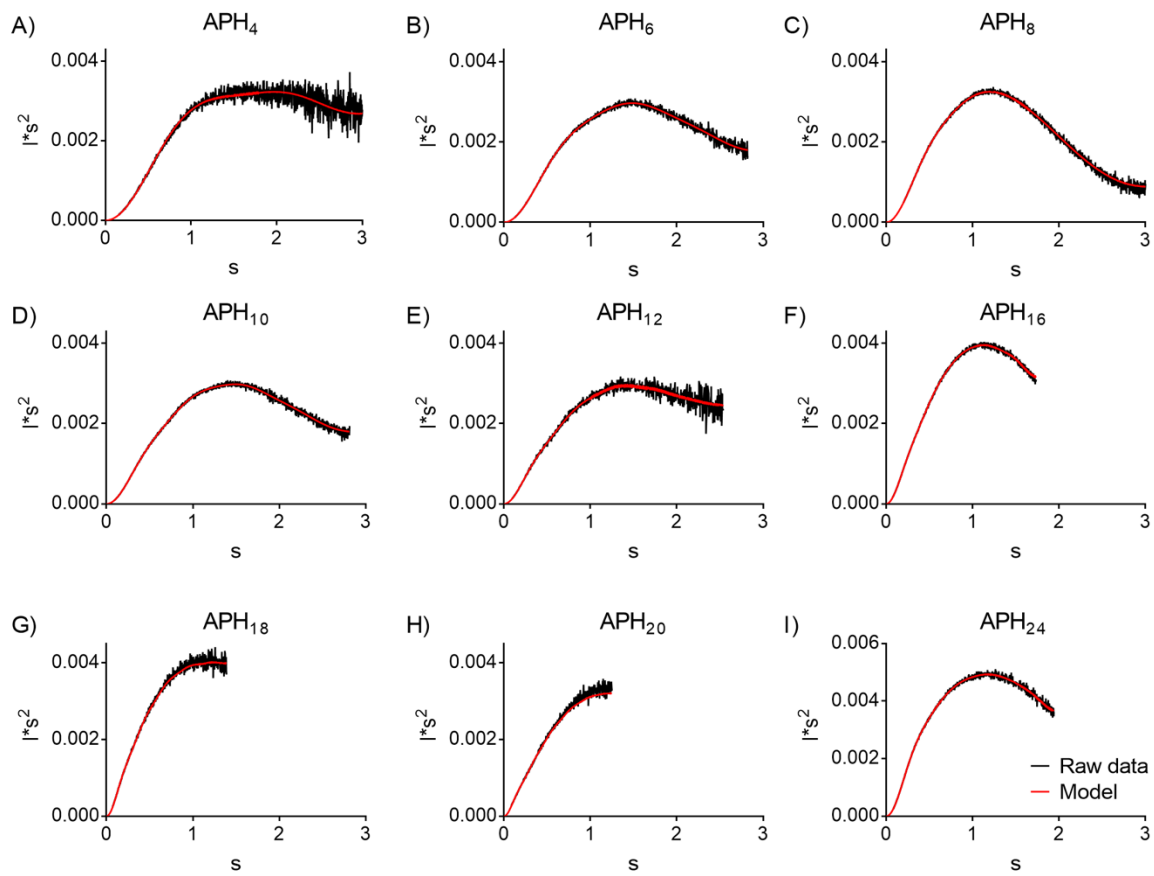

**Figure S2.** SAXS data of all APH variants represented as Kratky plots.

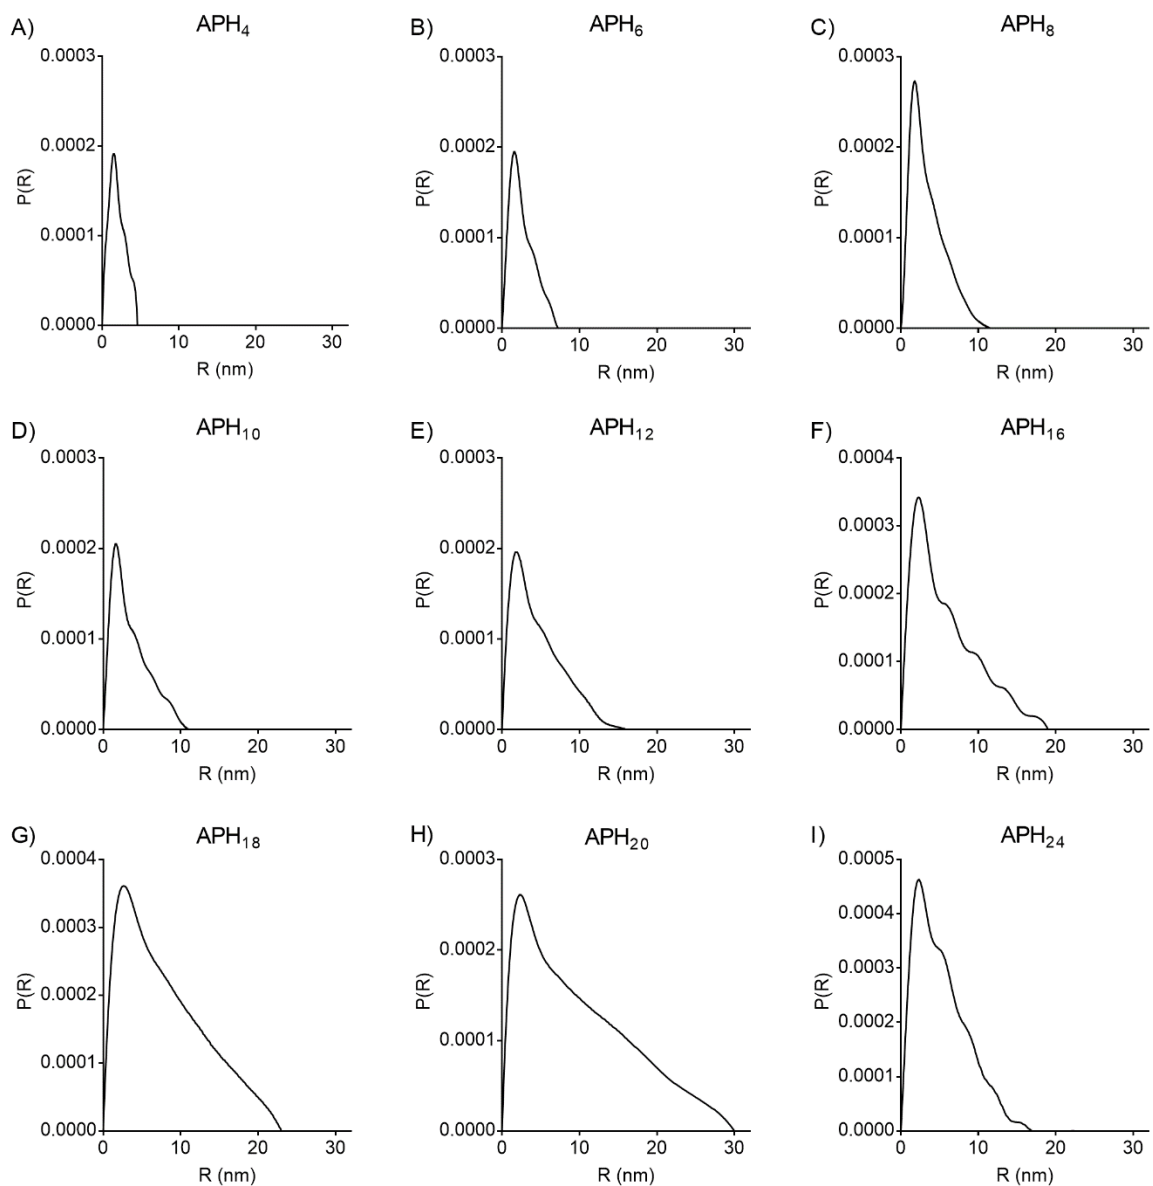

**Figure S3.** SAXS data for all variants represented as  $p(r)$  functions. The maximum distance ( $D_{\max}$ ) increases steadily up to APH<sub>18</sub>, whereafter it dramatically increase in APH<sub>20</sub> and is reduced in APH<sub>24</sub>. These data mirror the  $R_g$  and the  $R_h$  determined from DLS.



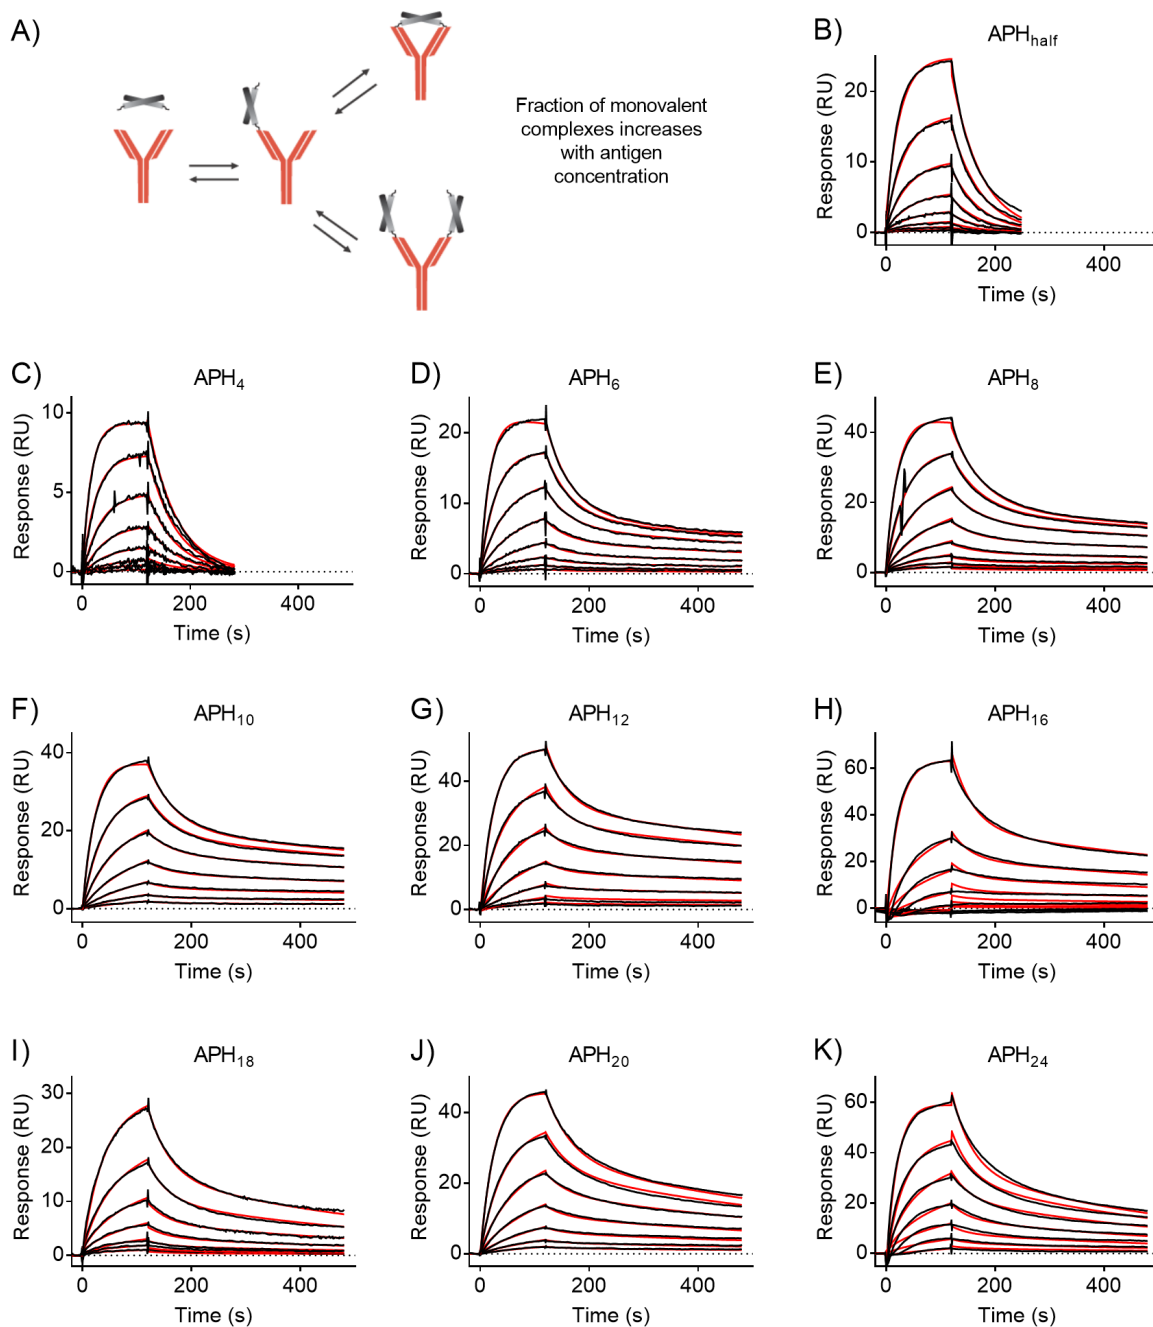

**Figure S4.** Binding of a bivalent antigen to an antibody can result in formation of mono- and bivalent complexes (A). Fraction of antigens interacting with an antibody via single epitope increases with the antigen concentration. Representative sensorgrams of all antigens binding to anti-His antibody at pH 5.8 are shown in (B) to (K). Black lines refer to raw data and 1:1 (APH<sub>half</sub>, APH<sub>4</sub>) or bivalent analyte (APH<sub>6</sub>, APH<sub>10</sub>, APH<sub>12</sub>, APH<sub>16</sub>, APH<sub>18</sub>, APH<sub>20</sub>, APH<sub>24</sub>) fit is shown as red lines.

A

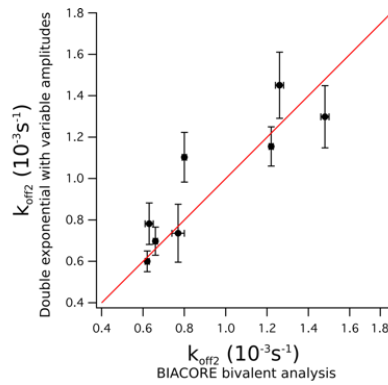

B

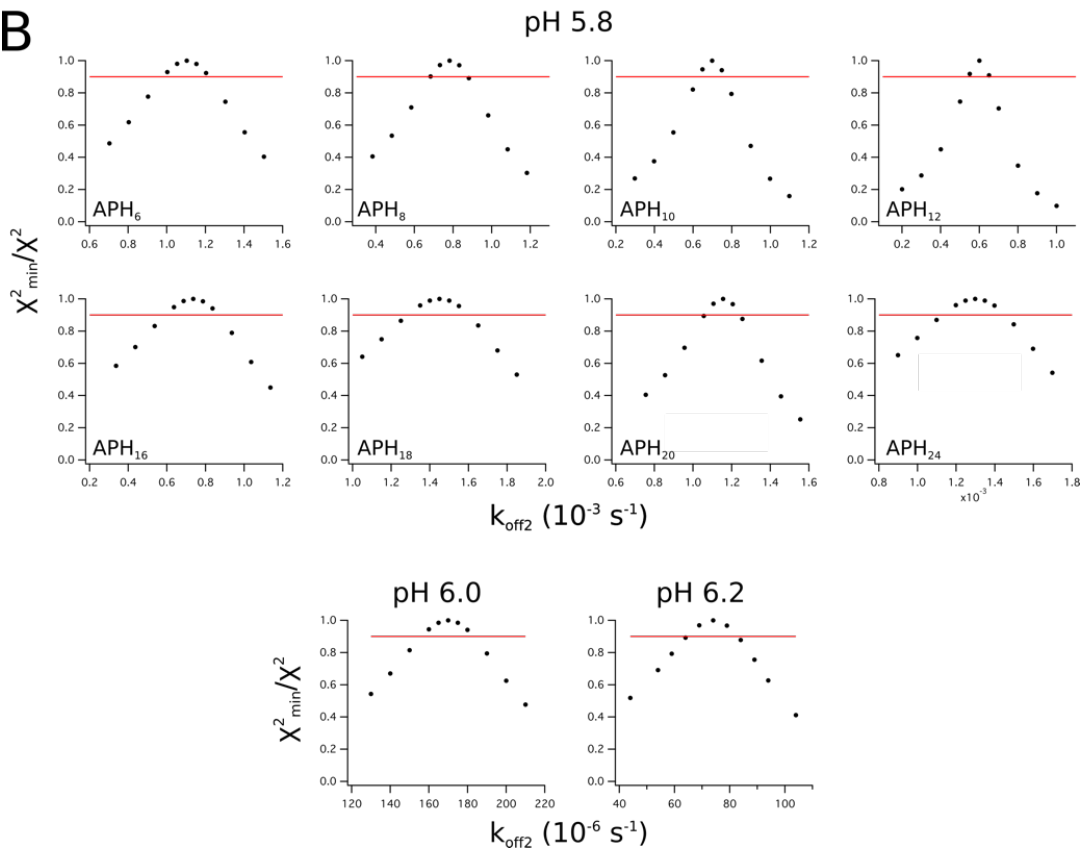

**Figure S5.** Confidence analysis of dissociation rate constants. A) The SPR data were either analysed by fitting the full data set to bivalent model in the BIACORE Evaluation software, resulting in adequate fits. We also fit the dissociation phase to a double exponential, where the amplitudes vary freely but the two rate constants are fitted globally, which improves the fit. B) To evaluate the confidence interval of the fitted rate constants, we evaluated the  $\chi^2$ -curves using the bivalent fit by locking  $k_{off2}$  to values around the fitted value and fitting the remaining parameters. All the fitted parameters are located in well-defined  $\chi^2$  minima, suggesting they are well determined by the data. Built-in error estimations typically underestimate the error associated with co-variance between fitted variables, and therefore we determined the confidence interval from a threshold of  $\chi^2_{min} / \chi^2 = 0.9$  (red line) following the criteria defined by Johnson et al. (Ref. 37 in main manuscript)
